# Supplementary material for: Increased Yields of the Guanine Oxidative Damage Product Imidazolone Following Exposure to LED Light
Source: MDPI journal article supplement (doi:10.3390/reactions4040046), 2023-12-16
Supplement: s1 [file s1]

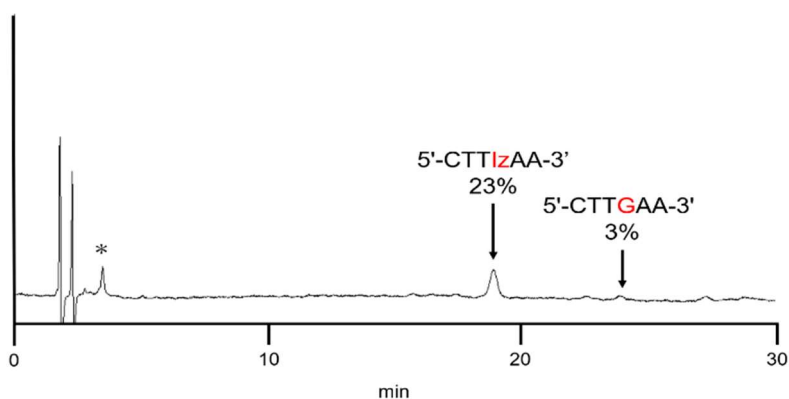

Figure S1 Photooxidation of guanine-containing DNA oligomers under irradiation with a LED light source for 60mins. “\*” was not derived from DNA.

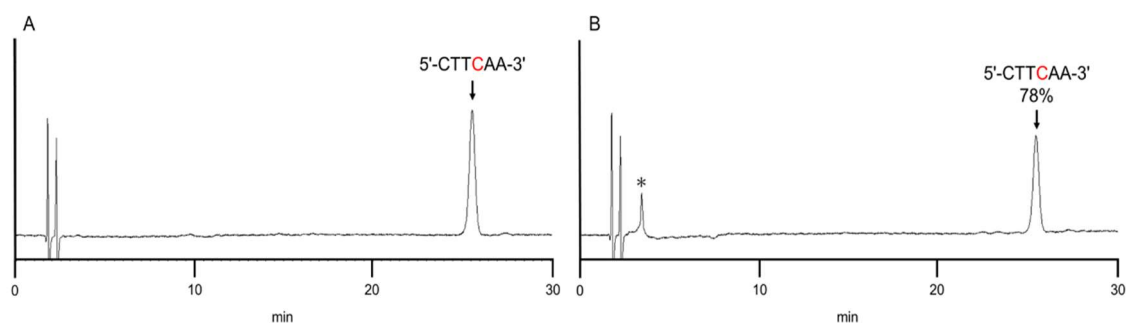

Figure S2 Photooxidation of cytosine-containing DNA oligomers under irradiation with a LED light source at an intensity of 51.2 mW/cm<sup>2</sup>. HPLC analysis (260 nm) of reaction solution after (A) no and (B) 2 min of irradiation. “\*” was not derived from DNA.

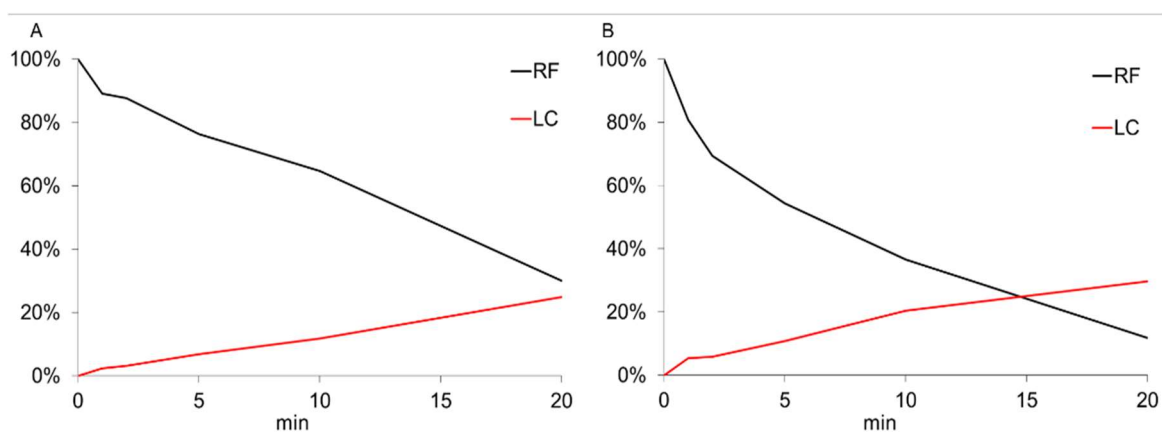

Figure S3 Photooxidation of riboflavin under irradiation with a LED light source for various reaction times. A solution was irradiated for various intervals with 450-nm light at an intensity of 13.8 mW/cm<sup>2</sup> (A) or with 365-nm light at an intensity of 25.6 mW/cm<sup>2</sup> (B).

Table S1 Photooxidation of guanine-containing DNA oligomers under irradiation with two LED light sources. The reaction solution consisted of 10  $\mu$ M 5'-CTTGAA-3', 75  $\mu$ M lumichrome, and 5 mM cacodylate buffer (pH 7.0)/0.84% DMSO.

| LED    | mW/cm <sup>2</sup> | time (min) | Iz  | G   |
|--------|--------------------|------------|-----|-----|
| 365 nm | 512                | 2          | 13% | 4%  |
| 450 nm | 275                | 2          | 0%  | 92% |
